# Supplementary material for: Characteristic smectic structures of main-chain liquid-crystalline polyimides driven by a microphase separation between aromatic imide mesogen and a siloxane spacer
Source: Royal Society of Chemistry journal article supplement (doi:10.1039/c1jm14566e), 2011-11-25
Supplement: c1jm14566e.pdf [file c1jm14566e.pdf]

## Electronic Supplementary Information (ESI)

### “Characteristic Smectic Structures of Main-Chain Liquid-Crystalline Polyimides Driven by a Microphase Separation between Aromatic Imide Mesogen and a Dimethyl Siloxane Spacer”

*Ryohei Ishige\*, Yu Shoji, Tomoya Higashihara, Mitsuru Ueda, and Junji Watanabe*

Department of Organic and Polymeric Materials, Graduate School of Science and Engineering,  
Tokyo Institute of Technology, 2-12-1-H-132, O-okayama, Meguro-Ku, Tokyo, 152-8552, Japan

E-mail address: rishige@polymer.titech.ac.jp

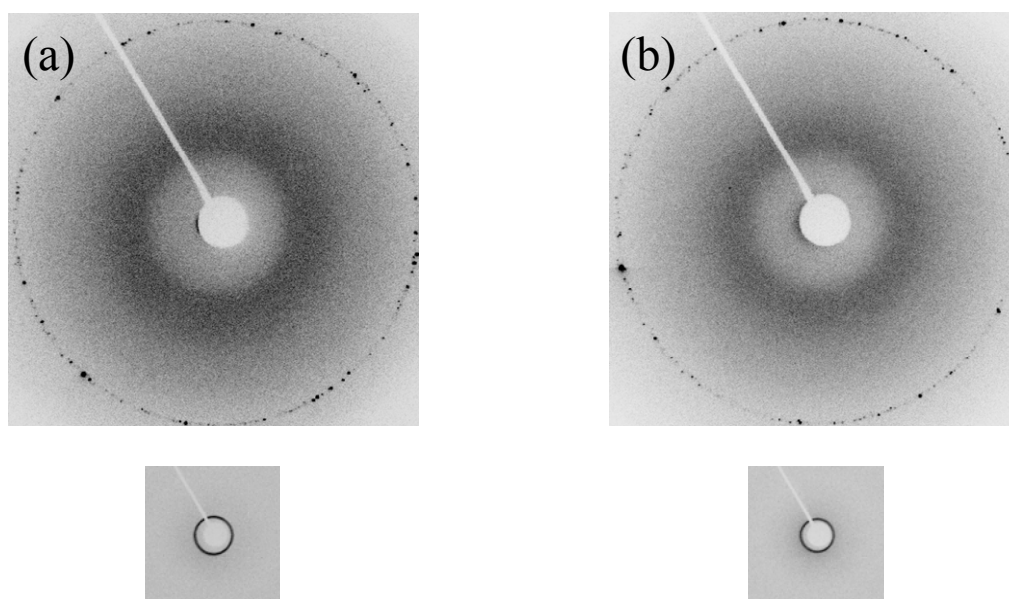

Figure S1. (a) The WAXD powder pattern observed at 170 °C in the  $S_C$  phase region and (b) observed at 230 °C in the  $S_A$  phase region. The photographs for the Debye-Scherrer ring of the inner sharp reflection are shown below those in wide angle region. The spacing of inner layer reflection was 31.1 Å at 170 °C and 35.7 Å at 230 °C, respectively. These values are absolutely same as those observed for the fiber specimen.

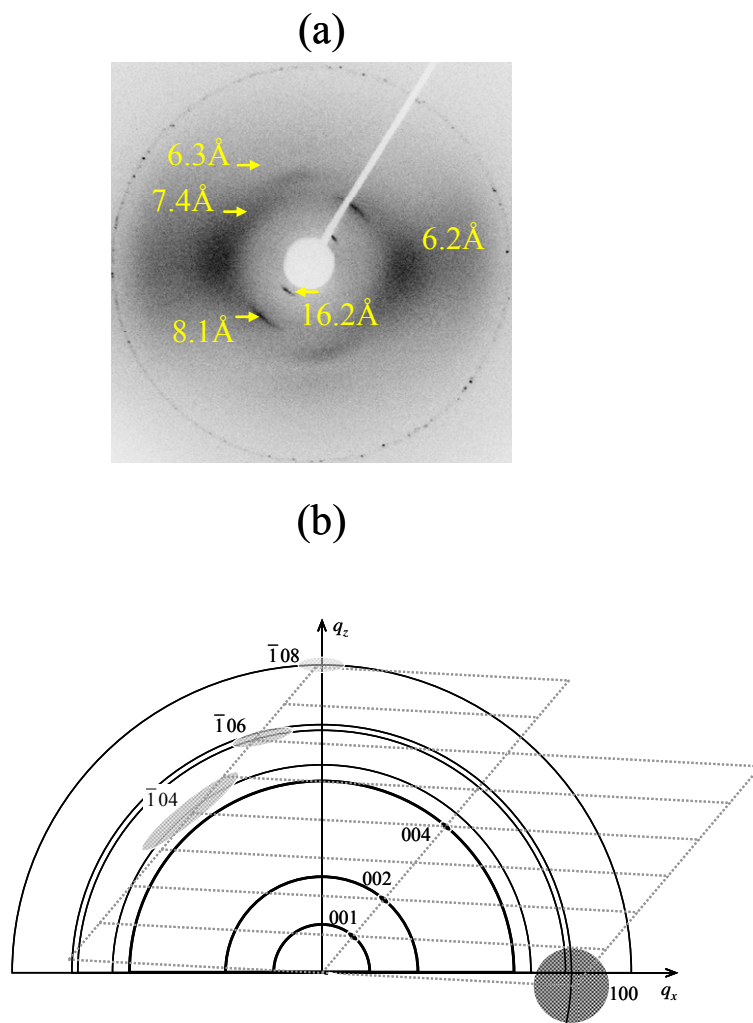

Figure S2. (a) The monodomain-like WAXD pattern for the  $S_C$  phase in the oriented film sample of BPDA/4SiO<sub>3</sub>-3Cl and (b) the two-dimensional reciprocal lattice satisfying the reflection positions.

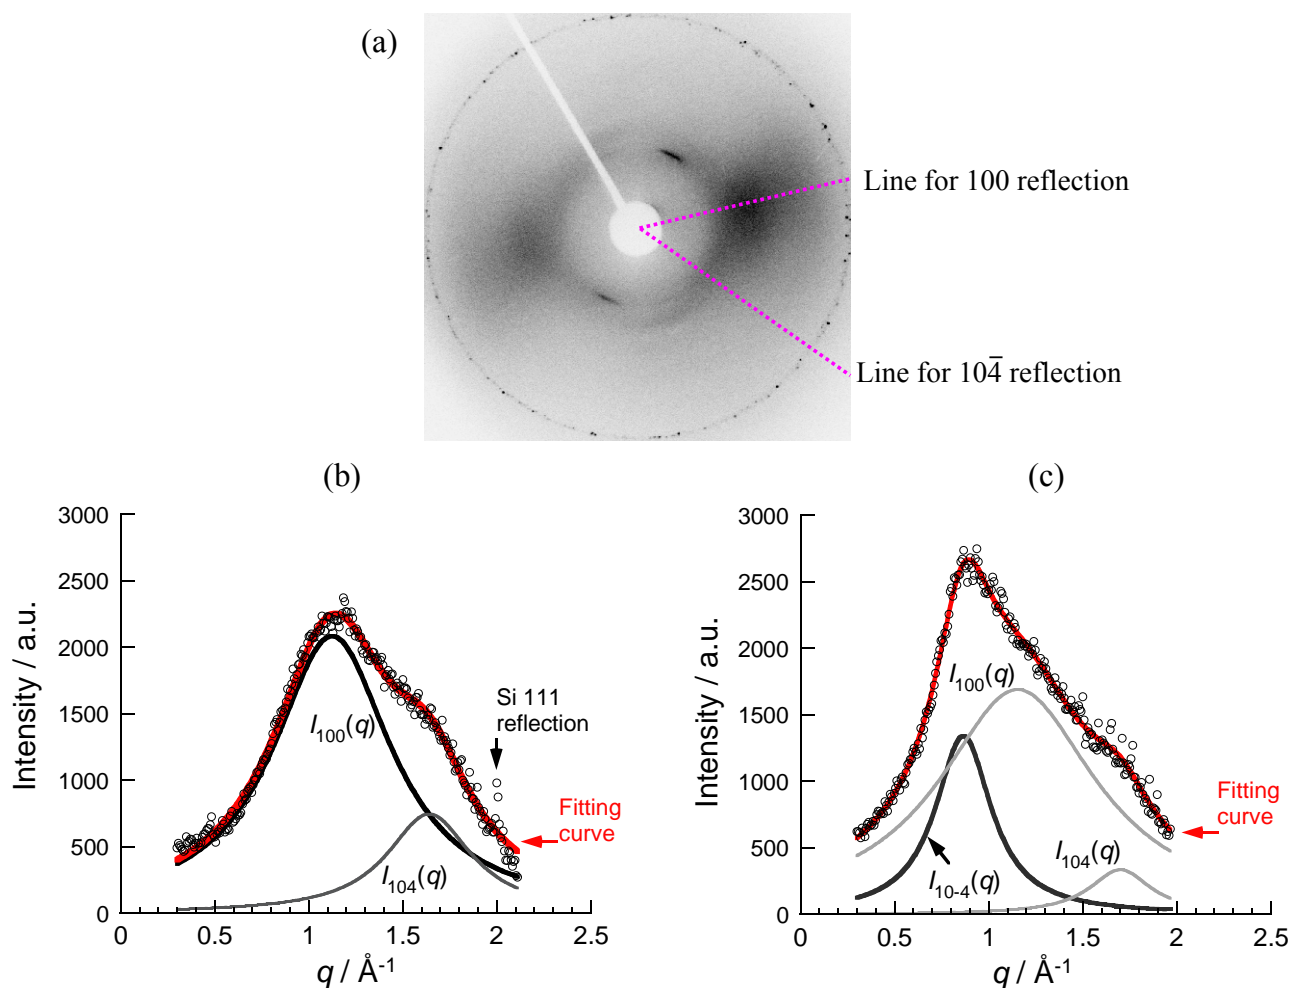

Figure S3. (a) The WAXD patterns of the monodomain-like films in the  $S_C$  phase. The line intensity profiles for the 100 and  $10\bar{4}$  reflections are obtained on the pink dotted lines on the WAXD pattern. The profiles with fitting curves (red solid line) for the 100 (b) and  $10\bar{4}$  (c) reflections are shown below the photograph. The profiles were fitted with sum of several Lorentz type functions because a broad reflection (most likely 104 reflection) was overlapped on the 100 reflection, and 100 and the broad reflection (104 reflection) were overlapped on the  $10\bar{4}$  reflection, respectively. The instrumental broadening of x-ray beam was neglected for the estimation of  $\xi$ , because the broadening estimated from the Si 111 reflection was too narrow compared with the width of those broad reflection and did not affect on the value of  $\xi$ .
